# Supplementary material for: Seed Priming with Mg(NO3)2 and ZnSO4 Salts Triggers the Germination and Growth Attributes Synergistically in Wheat Varieties
Source: MDPI journal article supplement (doi:10.3390/agronomy11112110), 2021-10-21
Supplement: s1 [file s1]

**Table S1.** Effect of hydro, Mg(NO<sub>3</sub>)<sub>2</sub>, ZnSO<sub>4</sub>, Mg(NO<sub>3</sub>)<sub>2</sub>+ ZnSO<sub>4</sub> primed and non-primed (control) seed treatments on plant height (cm) of wheat varieties, grown in the year 2018-19.

| Plant height (cm)       |                |                |       |                |                |       |                |                |       |
|-------------------------|----------------|----------------|-------|----------------|----------------|-------|----------------|----------------|-------|
| Days after sowing (DAS) |                |                |       |                |                |       |                |                |       |
| Treatment               | 35             |                |       | 45             |                |       | 60             |                |       |
|                         | V <sub>1</sub> | V <sub>2</sub> | Mean  | V <sub>1</sub> | V <sub>2</sub> | Mean  | V <sub>1</sub> | V <sub>2</sub> | Mean  |
| T <sub>1</sub>          | 26.46±1.56c    | 26.19±1.53c    | 26.33 | 39.01±0.27a    | 36.01±3.34a    | 37.51 | 61.23±1.37a    | 52.73±2.24a    | 56.98 |
| T <sub>2</sub>          | 27.41±1.76bc   | 27.00±0.47bc   | 27.20 | 39.88±1.72a    | 37.01±1.36a    | 38.44 | 62.40±1.85a    | 53.93±1.63a    | 58.17 |
| T <sub>3</sub>          | 29.51±0.48bc   | 29.35±0.66ab   | 29.43 | 40.53±2.52a    | 39.70±0.92a    | 40.11 | 63.55±2.20a    | 54.98±2.19a    | 59.26 |
| T <sub>4</sub>          | 30.20±2.17ab   | 29.98±1.83a    | 30.09 | 41.98±1.90a    | 40.17±2.40a    | 41.07 | 64.56±0.82a    | 56.53±1.45a    | 60.54 |
| T <sub>5</sub>          | 32.94±1.54a    | 31.04±0.60a    | 31.99 | 43.72±1.31a    | 41.30±0.74a    | 42.51 | 65.99±0.98a    | 57.92±1.63a    | 61.96 |
| Mean                    | 29.31          | 28.71          |       | 41.02          | 38.84          |       | 63.55          | 55.22          |       |
| Factors                 | 35 DAS         |                |       | 45 DAS         |                |       | 60 DAS         |                |       |
|                         | CD             | ±SEm           |       | CD             | ±SEm           |       | CD             | ±SEm           |       |
|                         | Factor A       | NS             | 0.43  | 1.68           | 0.56           |       | 1.66           | 0.55           |       |
|                         | Factor B       | 2.02           | 0.67  | 2.66           | 0.89           |       | 2.62           | 0.87           |       |
|                         | Factor A×B     | NS             | 0.95  | NS             | 1.26           |       | NS             | 1.24           |       |
|                         |                |                |       |                |                |       |                |                |       |

**Table S2.** Effect of hydro, Mg(NO<sub>3</sub>)<sub>2</sub>, ZnSO<sub>4</sub>, Mg(NO<sub>3</sub>)<sub>2</sub> + ZnSO<sub>4</sub> primed and non-primed (control) seed treatments on Leaf Area (cm<sup>2</sup>) of wheat varieties, grown in the year 2018-19.

| Leaf Area (cm <sup>2</sup> ) |                |                |               |                |                |               |                  |                  |                 |
|------------------------------|----------------|----------------|---------------|----------------|----------------|---------------|------------------|------------------|-----------------|
| Days after sowing (DAS)      |                |                |               |                |                |               |                  |                  |                 |
| Treatment                    | 35             |                |               | 45             |                |               | 60               |                  |                 |
|                              | V <sub>1</sub> | V <sub>2</sub> | Mean          | V <sub>1</sub> | V <sub>2</sub> | Mean          | V <sub>1</sub>   | V <sub>2</sub>   | Mean            |
| T <sub>1</sub>               | 171.80±12.88c  | 270.59±14.53b  | <b>221.19</b> | 276.73±20.34a  | 297.24±9.20c   | <b>286.98</b> | 792.61±22.10c    | 937.98±42.51a    | <b>865.29</b>   |
| T <sub>2</sub>               | 214.85±22.94bc | 277.59±12.54b  | <b>246.22</b> | 291.55±36.98a  | 300.54±16.70c  | <b>296.04</b> | 836.3±20.74c     | 1,083.94±109.79a | <b>960.12</b>   |
| T <sub>3</sub>               | 248.99±14.97ab | 284.15±28.70b  | <b>266.57</b> | 313.57±46.82a  | 367.94±9.72b   | <b>340.75</b> | 994.18±55.44b    | 1,178.51±274.67a | <b>1,086.34</b> |
| T <sub>4</sub>               | 269.03±33.06ab | 294.44±16.07ab | <b>281.73</b> | 328.88±31.96a  | 396.21±27.60b  | <b>362.55</b> | 1,093.69±47.07ab | 1,259.43±84.10a  | <b>1,176.56</b> |
| T <sub>5</sub>               | 282.41±25.84a  | 313.51±23.33a  | <b>297.96</b> | 367.06±20.78a  | 453.73±26.48a  | <b>410.39</b> | 1,159.84±63.79a  | 1,387.88±72.29a  | <b>1,273.86</b> |
| Mean                         | <b>237.42</b>  | <b>288.06</b>  |               | <b>315.56</b>  | <b>363.13</b>  |               | <b>975.32</b>    | <b>1,169.55</b>  |                 |
|                              |                |                |               |                |                |               |                  |                  |                 |
| Factors                      | 35 DAS         |                |               | 45 DAS         |                |               | 60 DAS           |                  |                 |
|                              | CD             | ±SEm           |               | CD             | ±SEm           |               | CD               | ±SEm             |                 |
| Factor A                     | 19.21          | 6.41           |               | 23.14          | 7.73           |               | 93.23            | 31.14            |                 |
| Factor B                     | 30.37          | 10.14          |               | 36.59          | 12.22          |               | 147.40           | 49.23            |                 |
| Factor A×B                   | NS             | 14.34          |               | NS             | 17.28          |               | NS               | 69.62            |                 |

**Table S3.** Effect of hydro, Mg(NO<sub>3</sub>)<sub>2</sub>, ZnSO<sub>4</sub>, Mg(NO<sub>3</sub>)<sub>2</sub>+ ZnSO<sub>4</sub> primed and non-primed (control) seed treatments on Nitrate reductase activity of leaves (n mol g<sup>-1</sup> h<sup>-1</sup> fresh weight) of wheat varieties, grown in the year 2018-19.

| Nitrate reductase (n mol g <sup>-1</sup> h <sup>-1</sup> fresh weight) |             |             |      |                |             |              |      |                |              |               |        |                |
|------------------------------------------------------------------------|-------------|-------------|------|----------------|-------------|--------------|------|----------------|--------------|---------------|--------|----------------|
| Treatm<br>ent                                                          | 35 DAS      |             |      |                | 45 DAS      |              |      |                | 60 DAS       |               |        |                |
|                                                                        | V1          | V2          | Mea  | Percenta       | V1          | V2           | Mea  | Percenta       | V1           | V2            | Mean   | Percenta       |
|                                                                        |             |             | n    | ge<br>Increase |             |              | n    | ge<br>Increase |              |               |        | ge<br>Increase |
| T <sub>1</sub>                                                         | 206.39±18.5 | 249.72±30.3 | 228. | 0.0            | 340.57±35.2 | 451.28±32.85 | 395. | 0.0            | 731.06±34.8  | 903.27±57.97  | 817.16 | 0.0            |
|                                                                        | 0d          | 0c          | 05   |                | 3d          | c            | 92   |                | 8c           | d             |        |                |
| T <sub>2</sub>                                                         | 244.18±20.4 | 280.77±27.0 | 262. | 15.09          | 404.29±15.3 | 517.76±27.94 | 461. | 16.44          | 876.81±94.3  | 990.18±11.92  | 933.49 | 14.23          |
|                                                                        | 3cd         | 7c          | 47   |                | 8cd         | c            | 02   |                | 4b           | cd            |        |                |
| T <sub>3</sub>                                                         | 279.79±21.8 | 349.02±28.3 | 314. | 37.86          | 447.97±41.9 | 626.90±62.10 | 537. | 35.74          | 1,005.48±30. | 1,092.43±43.5 | 1,048. | 28.36          |
|                                                                        | 7bc         | 0b          | 40   |                | 7bc         | bc           | 44   |                | 09a          | 3bc           | 96     |                |
| T <sub>4</sub>                                                         | 304.83±5.56 | 402.32±11.5 | 353. | 55.04          | 511.52±11.5 | 791.22±142.5 | 651. | 64.52          | 1,061.31±56. | 1,169.01±65.5 | 1,115. | 36.46          |
|                                                                        | ab          | 8ab         | 58   |                | 8ab         | 3ab          | 37   |                | 55a          | 5b            | 16     |                |
| T <sub>5</sub>                                                         | 325.53±29.3 | 446.57±22.7 | 386. | 69.28          | 582.77±22.7 | 915.12±30.23 | 748. | 89.16          | 1,120.21±27. | 1,304.83±33.9 | 1,212. | 48.38          |
|                                                                        | 5a          | 8a          | 05   |                | 8a          | a            | 94   |                | 53a          | 1a            | 52     |                |
| Mean                                                                   | 272.14      | 345.68      |      |                | 457.42      | 660.46       |      |                | 958.97       | 1,091.95      |        |                |
|                                                                        |             | 35 DAS      |      |                |             | 45 DAS       |      |                |              | 60 DAS        |        |                |
|                                                                        | CD          |             | ±SEm |                | CD          |              | ±SEm |                | CD           |               | ±SEm   |                |

|                   |       |       |       |        |       |       |
|-------------------|-------|-------|-------|--------|-------|-------|
| <b>Factors</b>    |       |       |       |        |       |       |
| <b>Factor A</b>   | 21.32 | 7.12  | 56.21 | 18.77  | 47.94 | 16.01 |
| <b>Factor B</b>   | 33.72 | 11.26 | 88.87 | 29.68  | 75.79 | 25.31 |
| <b>Factor A×B</b> | NS    | 15.92 | NS    | 41.976 | NS    | 35.79 |

**Table S4.** Effect of hydro, Mg(NO<sub>3</sub>)<sub>2</sub>, ZnSO<sub>4</sub>, Mg(NO<sub>3</sub>)<sub>2</sub> + ZnSO<sub>4</sub> primed and non-primed (control) seed treatments on Protein content (mg g<sup>-1</sup>) of leaves of wheat varieties, grown in the year 2018-19.

| Treatment      | Protein content (mg g <sup>-1</sup> ) |                   |               |                     |                  |                    |               |                     |                   |                  |               |                     |
|----------------|---------------------------------------|-------------------|---------------|---------------------|------------------|--------------------|---------------|---------------------|-------------------|------------------|---------------|---------------------|
|                | Days after sowing (DAS)               |                   |               |                     |                  |                    |               |                     |                   |                  |               |                     |
|                | 35                                    |                   |               |                     | 45               |                    |               |                     | 60                |                  |               |                     |
|                | V1                                    | V2                | Mean          | Percentage Increase | V1               | V2                 | Mean          | Percentage Increase | V1                | V2               | Mean          | Percentage Increase |
| T <sub>1</sub> | 129.41±1.74<br>d                      | 139.59±2.4<br>3c  | <b>134.50</b> | 0.0                 | 160.55±1.<br>96b | 168.06±1.77<br>c   | <b>164.30</b> | 0.0                 | 164.10±1.<br>70d  | 172.65±4.<br>52a | <b>168.38</b> | 0.0                 |
| T <sub>2</sub> | 135.96±3.70<br>c                      | 146.86±3.0<br>1bc | <b>141.41</b> | 5.14                | 162.73±2.<br>53b | 170.19±3.15<br>bc  | <b>166.46</b> | 1.31                | 166.06±1.<br>53cd | 174.02±7.<br>32a | <b>170.04</b> | 0.98                |
| T <sub>3</sub> | 143.68±3.32<br>b                      | 154.02±3.4<br>4b  | <b>148.85</b> | 10.67               | 169.58±0.<br>78a | 177.72±1.81<br>abc | <b>173.65</b> | 5.69                | 174.07±3.<br>97bc | 189.98±6.<br>32a | <b>182.02</b> | 8.10                |
| T <sub>4</sub> | 147.25±5.07<br>ab                     | 163.31±3.5<br>2a  | <b>155.28</b> | 15.45               | 171.81±1.<br>86a | 174.87±3.33<br>ab  | <b>173.34</b> | 5.50                | 178.97±3.<br>81ab | 186.47±7.<br>56a | <b>182.72</b> | 8.52                |
| T <sub>5</sub> | 152.13±2.28<br>a                      | 166.33±4.3<br>7a  | <b>159.23</b> | 18.39               | 173.14±3.<br>54a | 181.18±4.82<br>a   | <b>177.16</b> | 7.83                | 183.67±4.<br>48a  | 192.52±4.<br>40a | <b>188.09</b> | 11.70               |

| Mean              | 141.68 | 154.02 | 167.56 | 174.40 | 173.38 | 183.13 |
|-------------------|--------|--------|--------|--------|--------|--------|
|                   | 35 DAS |        | 45 DAS |        | 60 DAS |        |
|                   | CD     | ±SEm   | CD     | ±SEm   | CD     | ±SEm   |
| <b>Factors</b>    |        |        |        |        |        |        |
| <b>Factor A</b>   | 3.24   | 1.08   | 2.69   | 0.9    | 4.83   | 1.61   |
| <b>Factor B</b>   | 5.13   | 1.71   | 4.26   | 1.42   | 7.64   | 2.55   |
| <b>Factor A×B</b> | N/S    | 2.42   | N/S    | 2.01   | N/S    | 3.61   |

---

**Abbreviations used in supplementary tables:** T1; nonprimed (control), T2; hydro primed, T3; Mg(NO<sub>3</sub>)<sub>2</sub> primed with 7.5 mM solution, T4; ZnSO<sub>4</sub> primed with 50 ppm solution, T5; Mg(NO<sub>3</sub>)<sub>2</sub> + ZnSO<sub>4</sub> primed with 7.5 mM + 50 ppm solution, V1; HUW-234, V2; BHU-3, NS; non-significant, CD; critical difference, ± SEm: standard error of mean. Lowercase alphabetical letters (a,b,c) represents the significant differences between the different seed priming treatments (Tukey test;  $p < 0.05$ ).
