# Supplementary material for: Seed Priming with Mg(NO3)2 and ZnSO4 Salts Triggers the Germination and Growth Attributes Synergistically in Wheat Varieties
Source: MDPI journal article supplement (doi:10.3390/agronomy11112110), 2021-10-21
Supplement: s1 [file s1]

**Figure S1** Effect of hydro,  $\text{Mg}(\text{NO}_3)_2$ ,  $\text{ZnSO}_4$ ,  $\text{Mg}(\text{NO}_3)_2 + \text{ZnSO}_4$  primed and non-primed (control) seed treatments on Leaf number per hill of wheat varieties, grown in the year 2018-19.

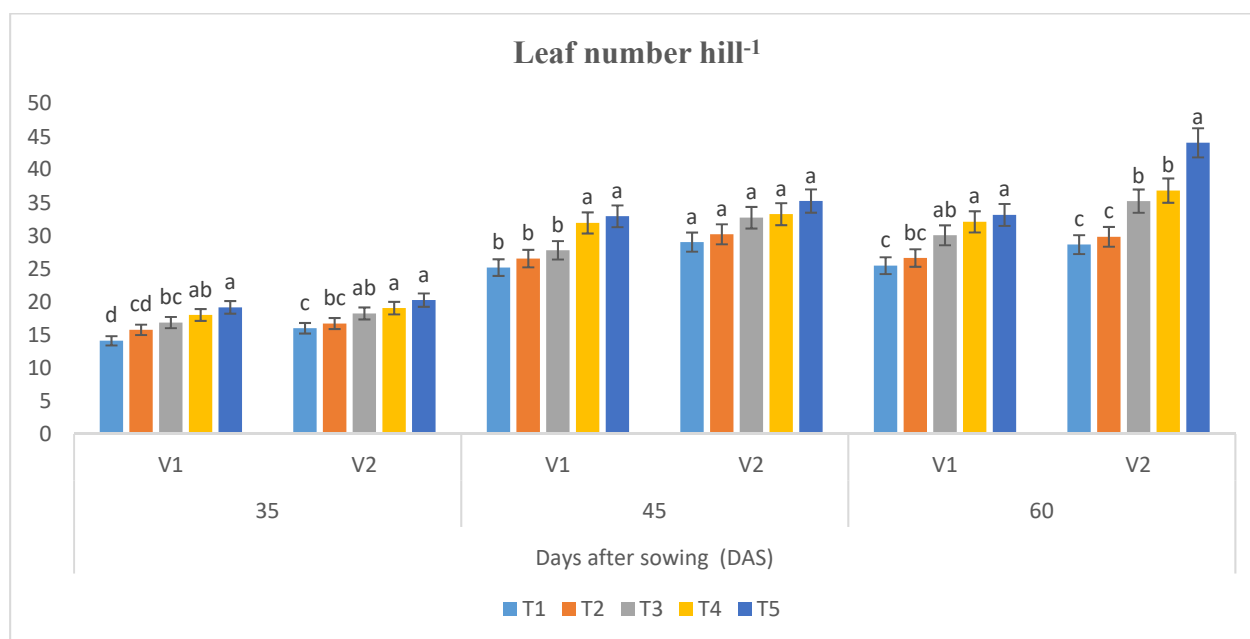

**Figure S2** Effect of hydro,  $\text{Mg}(\text{NO}_3)_2$ ,  $\text{ZnSO}_4$ ,  $\text{Mg}(\text{NO}_3)_2 + \text{ZnSO}_4$  primed and non-primed (control) seed treatments on total plant fresh biomass (g) of wheat varieties, grown in the year 2018-19.

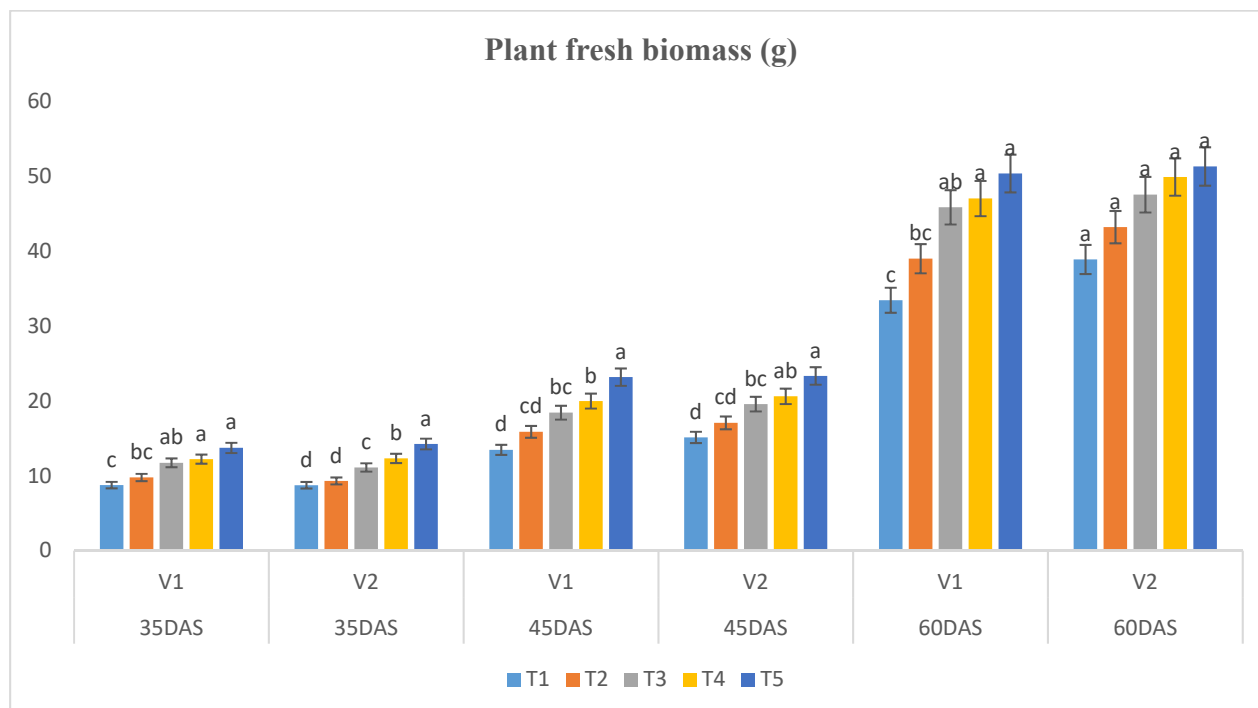

**Figure S3** Effect of hydro,  $\text{Mg}(\text{NO}_3)_2$ ,  $\text{ZnSO}_4$ ,  $\text{Mg}(\text{NO}_3)_2 + \text{ZnSO}_4$  primed and non-primed (control) seed treatments on total plant dry biomass (g) of wheat varieties, grown in the year 2018-19.

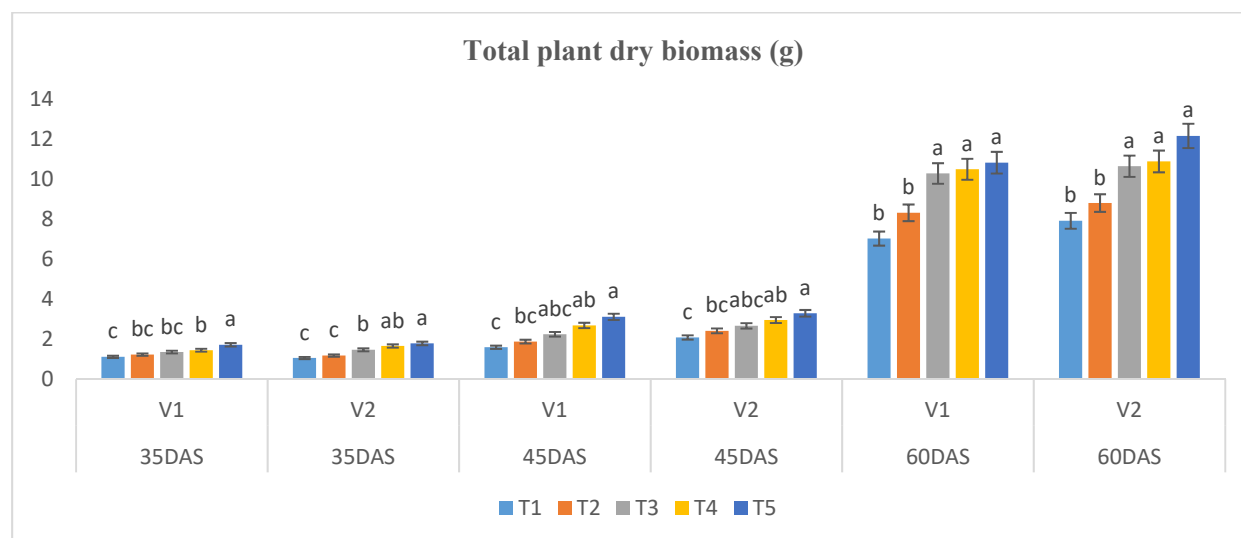

**Figure S4** Effect of hydro,  $\text{Mg}(\text{NO}_3)_2$ ,  $\text{ZnSO}_4$ ,  $\text{Mg}(\text{NO}_3)_2 + \text{ZnSO}_4$  primed and non-primed (control) seed treatments on Chlorophyll content of wheat varieties, grown in the year 2018-19.

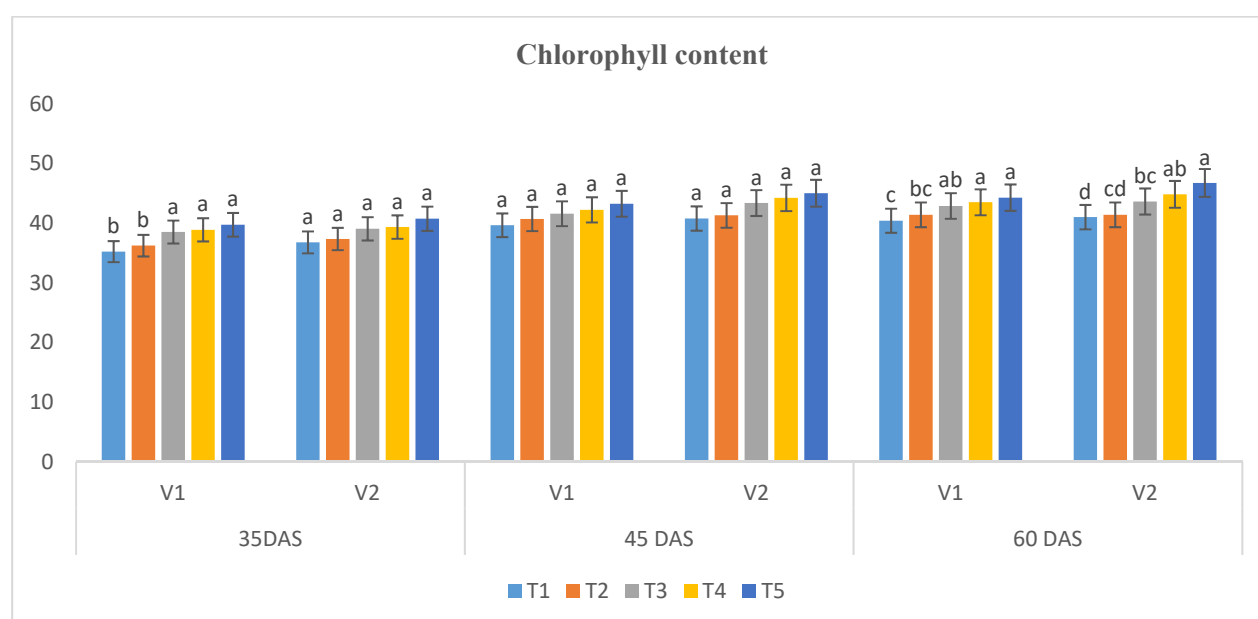

**Abbreviations:** T1; nonprimed (control), T2; hydro primed, T3;  $\text{Mg}(\text{NO}_3)_2$  primed with 7.5 mM solution, T4;  $\text{ZnSO}_4$  primed with 50 ppm solution, T5;  $\text{Mg}(\text{NO}_3)_2 + \text{ZnSO}_4$  primed with 7.5 mM + 50 ppm solution, V1; HUW-234, V2; BHU-3, Lowercase alphabetical letters (a,b,c) represents the significant differences between the different seed priming treatments (Tukey test;  $p < 0.05$ ).
